# Supplementary material
Source: publisher figshare collection journal article supplement (https://acs.figshare.com/ndownloader/files/4014283)
Supplement: Supplementary file 1 [file 4014283]

# Mechanism Study of Copper-mediated One-pot Reductive Amination of Aryl Halides Using Trimethylsilyl Azide

Toshihide Maejima,<sup>†</sup> Moriatsu Ueda,<sup>‡</sup> Jun Nakano,<sup>‡</sup> Yoshinari Sawama,<sup>†</sup> Yasunari Monguchi,<sup>\*,†</sup>  
and Hironao Sajiki<sup>\*,†</sup>

<sup>†</sup> Laboratory of Organic Chemistry, Gifu Pharmaceutical University, 1-25-4 Daigaku-nishi, Gifu  
501-1196, Japan

email: sajiki@gifu-pu.ac.jp

<sup>‡</sup> Bruker Optics K. K., 1-4-1 Shinkawa, Chuo-ku, Tokyo 104-0033, Japan

## Supporting Information

### Contents

|                                                                                                                                                                                                      |    |
|------------------------------------------------------------------------------------------------------------------------------------------------------------------------------------------------------|----|
| 1. <sup>1</sup> H and <sup>13</sup> C NMR spectra of ethyl 4-aminobenzoate (2) .....                                                                                                                 | S2 |
| 2. <sup>1</sup> H and <sup>13</sup> C NMR spectra of 4-(4-phenyl-1 <i>H</i> -1,2,3-triazol-yl)benzoate (5) .....                                                                                     | S3 |
| 3. IR spectra .....                                                                                                                                                                                  | S4 |
| (1) Tetrabutylammonium azide in DMA .....                                                                                                                                                            | S4 |
| (2) Ethyl 4-azidobenzoate (3) in DMA .....                                                                                                                                                           | S4 |
| 4. Time-course study using reaction monitoring FT-IR for the reaction of ethyl<br>4-azidobenzoate (3) with copper powder, and 2-aminoethanol in DMA at 95 °C for 1 h .....                           | S5 |
| 5. Time-course study using reaction monitoring FT-IR for the reaction of ethyl 4-bromobenzoate (1)<br>with copper powder, and 2-aminoethanol in DMA in the presence of ethynylbenzene (4) at 95 °C · | S6 |
| (1) 0–1 h .....                                                                                                                                                                                      | S6 |
| (2) 0–9 h .....                                                                                                                                                                                      | S6 |
| (3) The influence of ethynylbenzene (4) on IR spectrum of a mixture of copper, TMSN <sub>3</sub> , and<br>2-aminoethanol in the absence of ethyl 4-bromobenzoate (1) .....                           | S7 |

1.  $^1\text{H}$  and  $^{13}\text{C}$  NMR spectra of ethyl 4-aminobenzoate (2).

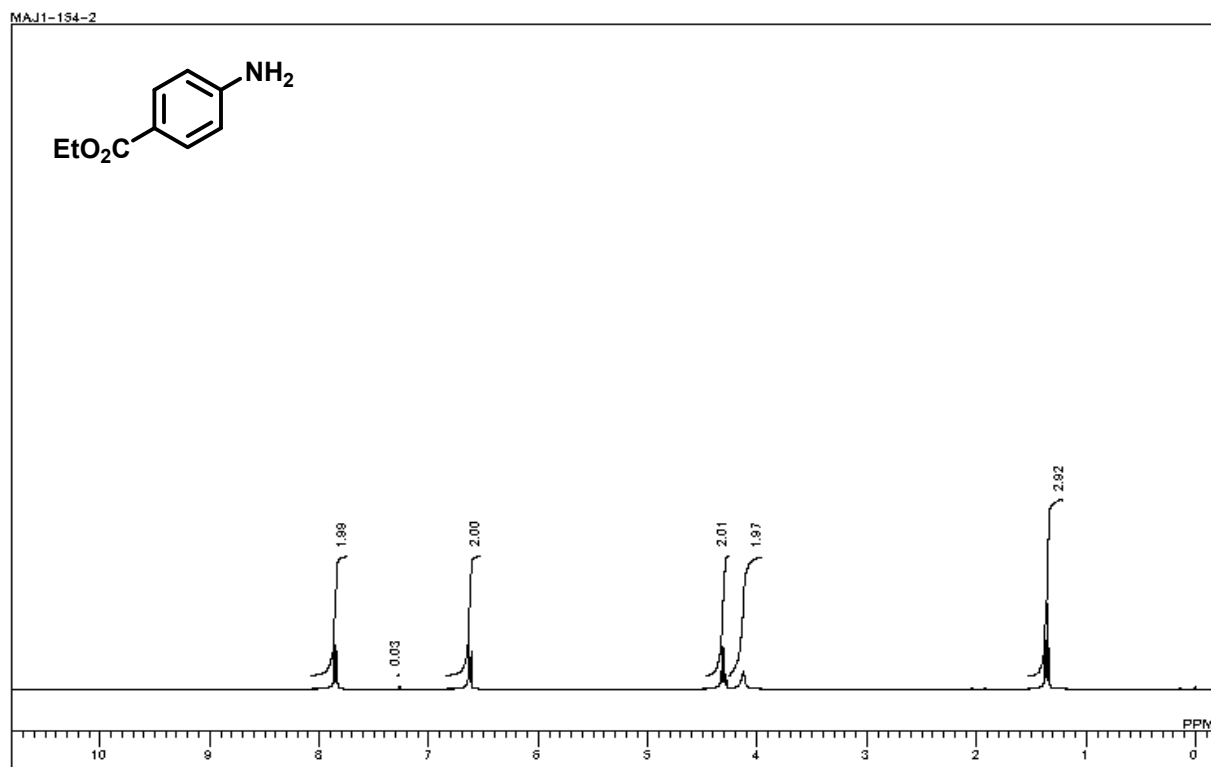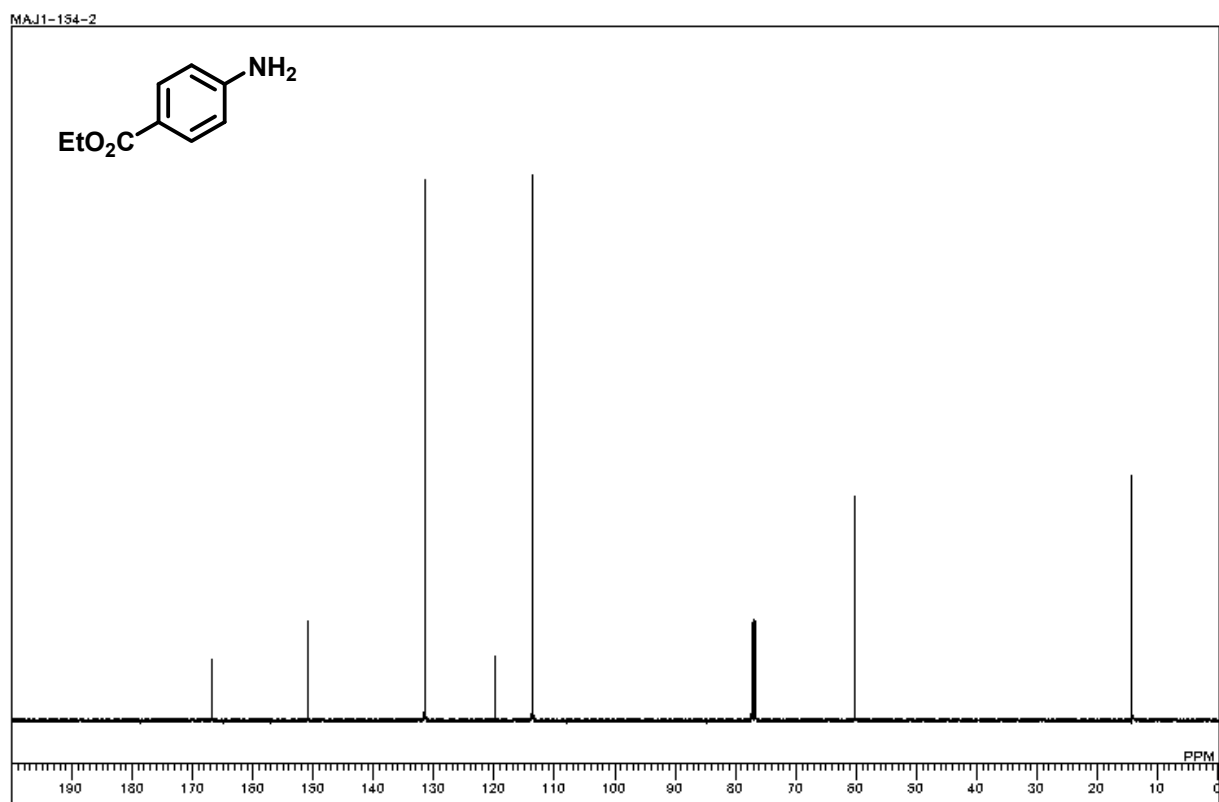

2.  $^1\text{H}$  and  $^{13}\text{C}$  NMR spectra of 4-(4-phenyl-1*H*-1,2,3-triazol-yl)benzoate (5).

MAJ9-84-2-CDCl<sub>3</sub>-500MHz

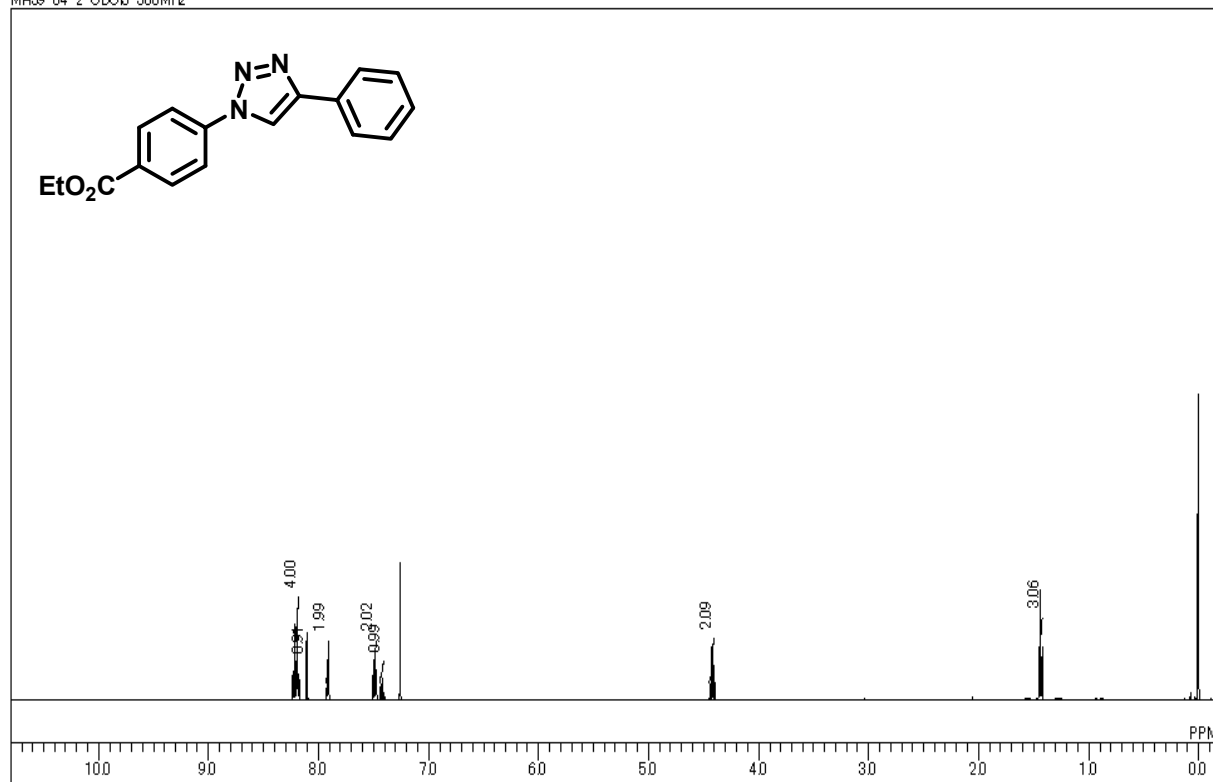

MAJ9-84-2-13C-CDCl<sub>3</sub>-125MHz

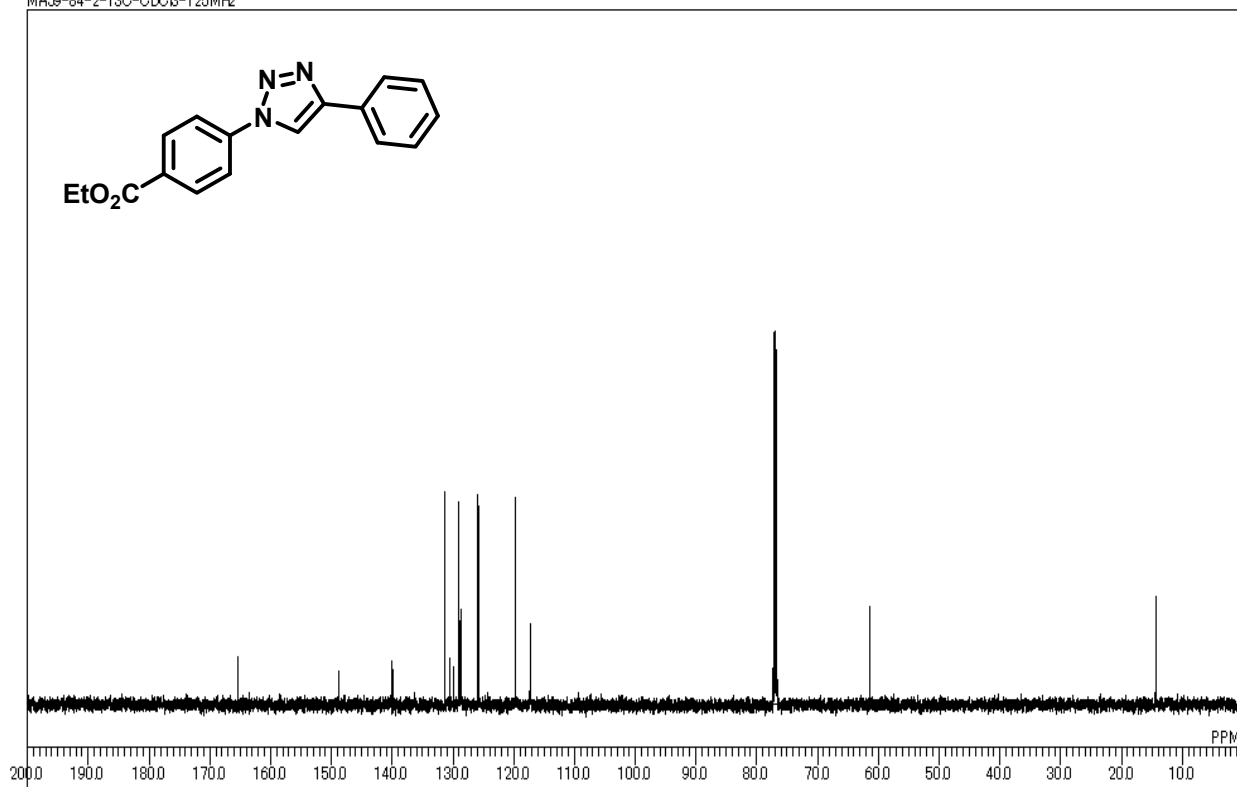

### 3. IR spectra

#### (1) Tetrabutylammonium azide in DMA

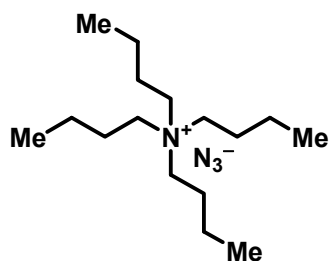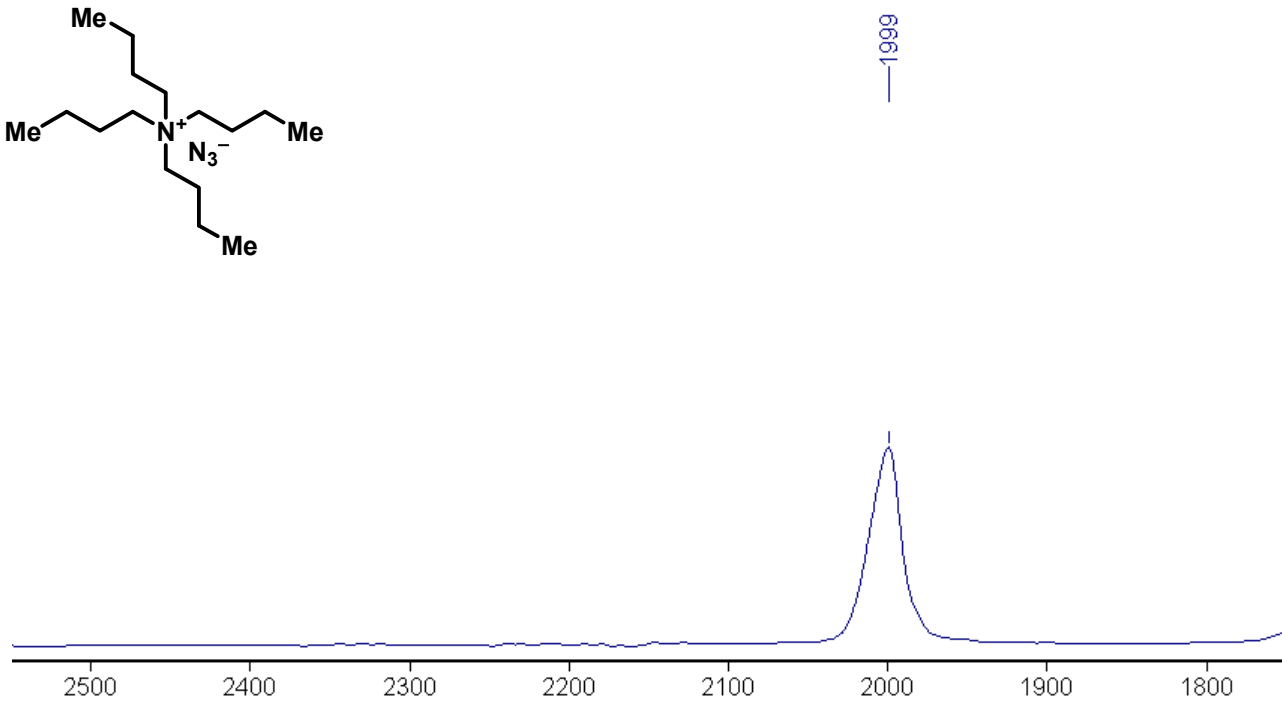

#### (2) Ethyl 4-azidobenzoate (3) in DMA

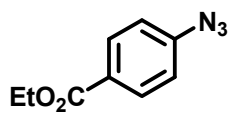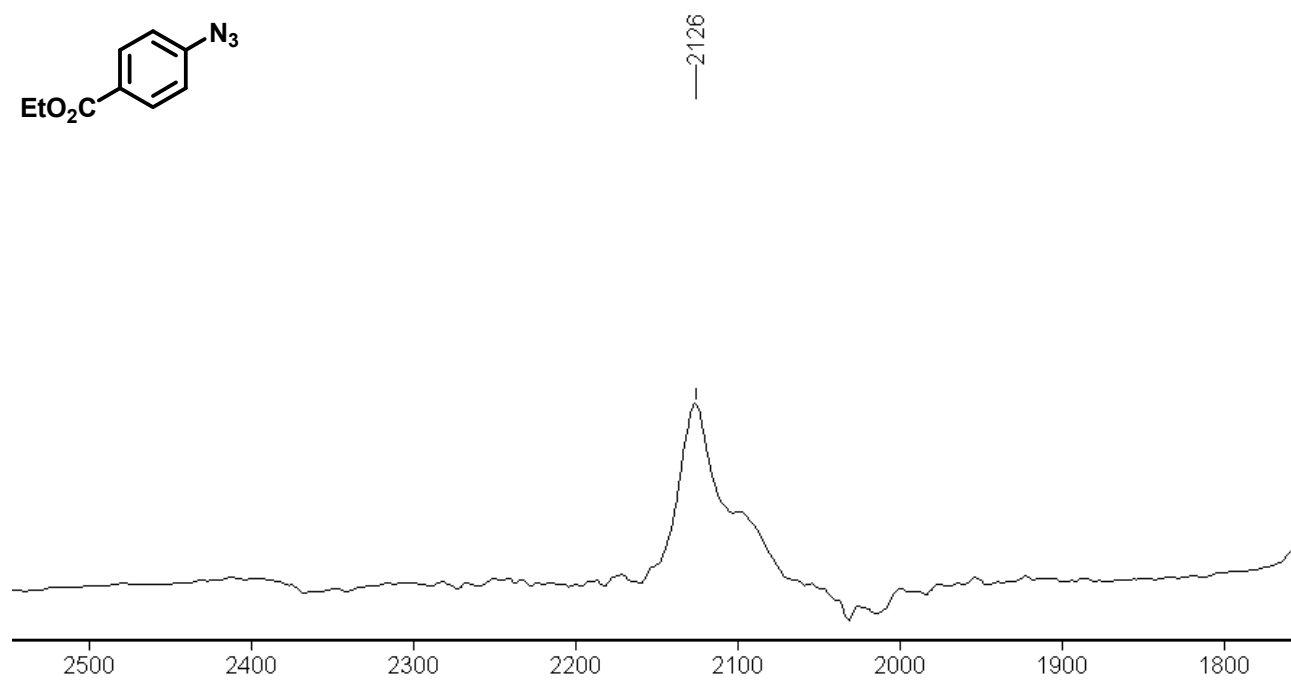

**4. Time-course study using reaction monitoring FT-IR for the reaction of ethyl 4-azidobenzoate (3) with copper powder, and 2-aminoethanol in DMA at 95 °C for 1 h**

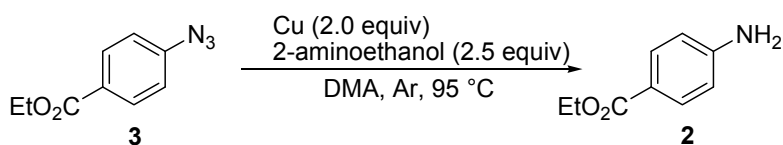

A mixture of ethyl 4-azidobenzoate (**3**) (161 mg, 839  $\mu\text{mol}$ ), copper powder (107 mg, 1.68 mmol), and 2-aminoethanol (126  $\mu\text{L}$ , 2.10 mmol) in DMA (1.7 mL) in a 10-mL two-neck flask was stirred under an Ar atmosphere (balloon) at 95 °C, and the IR peak of the mixture was monitored vs. time.

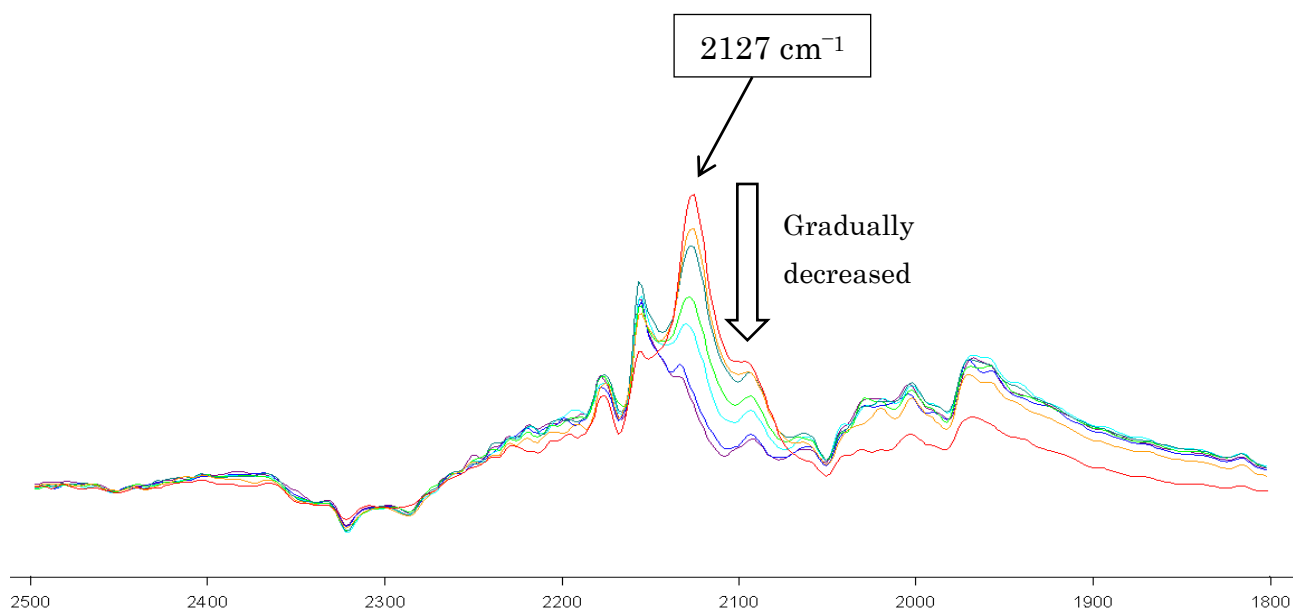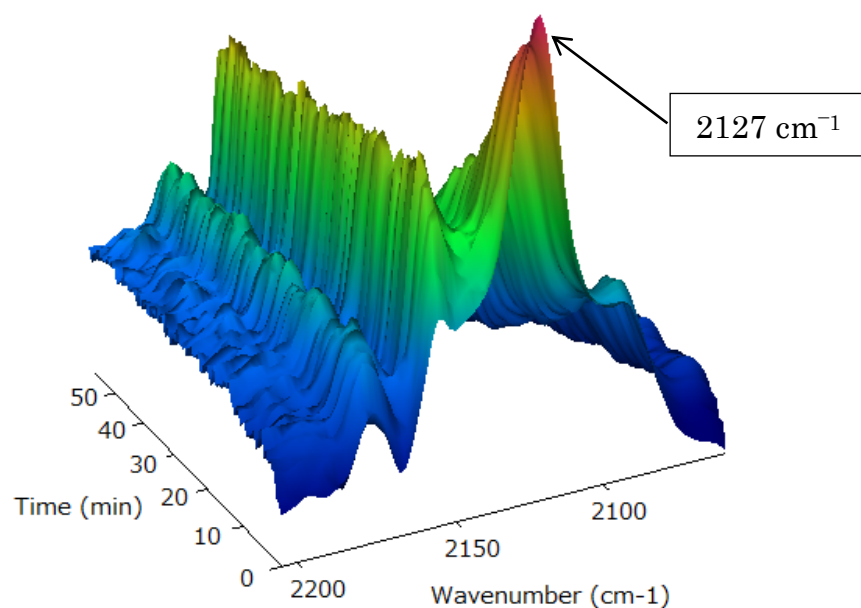

**5. Time-course study using reaction monitoring FT-IR for the reaction of ethyl 4-bromobenzoate (1) with copper powder, and 2-aminoethanol in DMA in the presence of ethynylbenzene (4) at 95 °C**

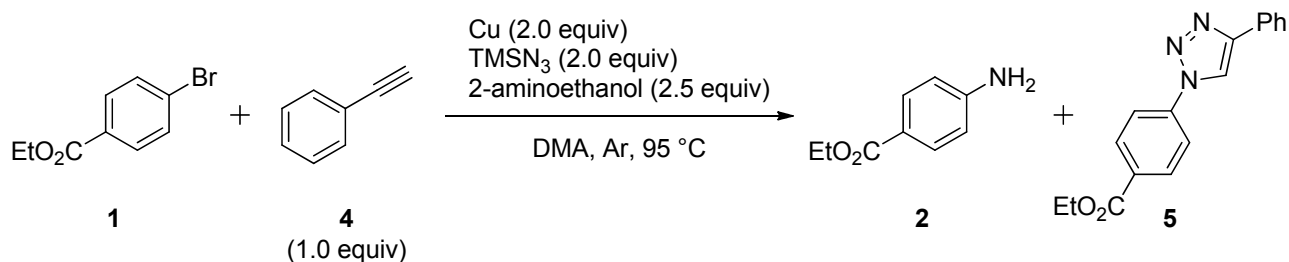

A mixture of ethyl 4-bromobenzoate (1) (229 mg, 1.00 mmol), ethynylbenzene (4) (102 mg, 1.00 mmol), copper powder (127 mg, 2.00 mmol), 2-aminoethanol (151  $\mu$ L, 2.50 mmol), and TMSN<sub>3</sub> (266  $\mu$ L, 2.00 mmol) in DMA (2 mL) in a 20-mL two-neck flask was stirred under an Ar atmosphere (balloon) at 95 °C, and the IR peak of the mixture was monitored vs. time.

**(1) 0–1 h.** (pink  $\rightarrow$  red  $\rightarrow$  yellow  $\rightarrow$  green  $\rightarrow$  sky blue  $\rightarrow$  blue  $\rightarrow$  grey)

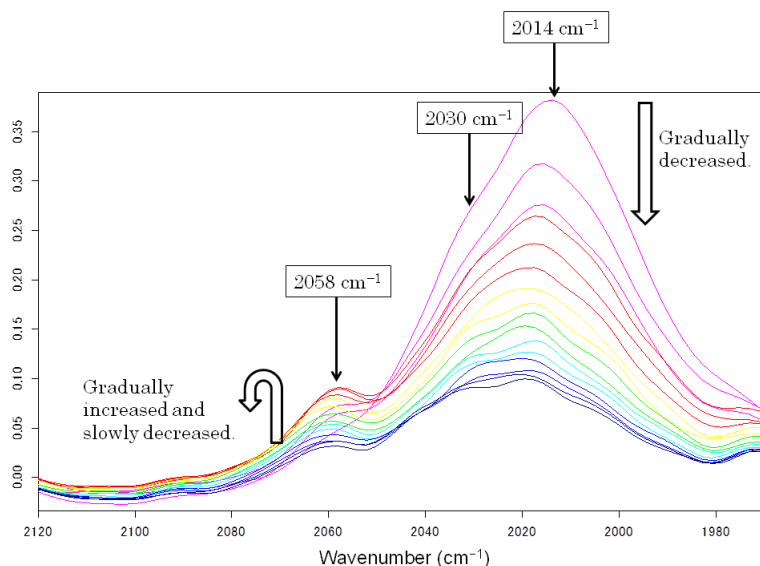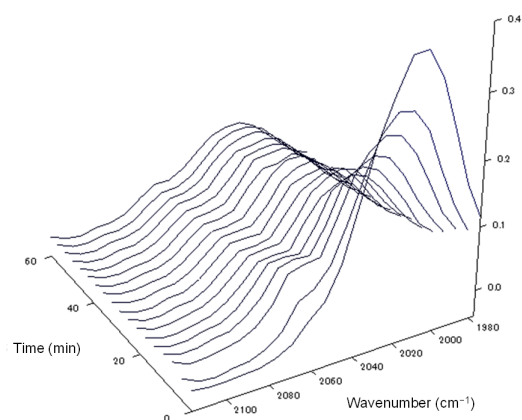

**(2) 0–9 h.**

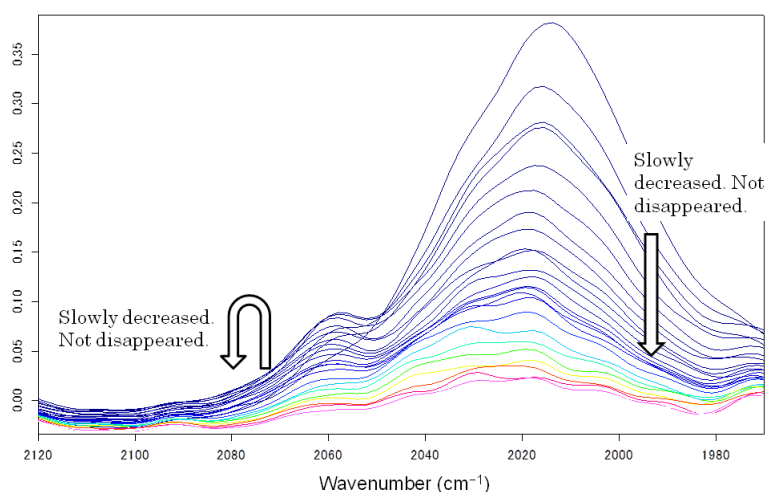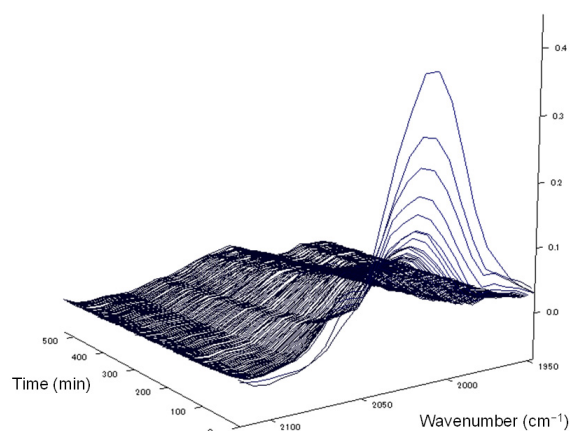

The copper-mediated amination of ethyl 4-bromobenzoate (**1**) with  $\text{TMSN}_3$  and 2-aminoethanol in DMA in the presence of ethynylbenzene (**4**) was monitored by the reaction-monitoring FT-IR spectrometer. The peaks at 2014 and 2030 (shoulder)  $\text{cm}^{-1}$  were initially observed, and the peak strength gradually and slowly decreased over more than 9 hours. The new peak at 2058  $\text{cm}^{-1}$ , which is considered to be for  $\text{CuN}_3$ , appeared just after heating, and the peak also decreased over hours. These phenomena suggest that the reaction is likely to proceed in a different manner from the case without **4**; the 2030  $\text{cm}^{-1}$  peak was not observed, the peak at 2012  $\text{cm}^{-1}$  disappeared within 1 h, and newly observed peak at 2058  $\text{cm}^{-1}$  was not declined after 1 h, in the absence of **4**. The difference might come from the possible involvement of copper species with acetylene, e.g., formation of copper acetylide.

Furthermore, the generation of aryl azide, ethyl 4-azidobenzoate (**3**), as the intermediate, was not confirmed by this experiment. It was also difficult to observe the formation of triazole (**5**) because of its overlapped IR peaks with those of other materials, such as starting materials and DMA.

### (3) The influence of ethynylbenzene (**4**) on IR spectrum of a mixture of copper, $\text{TMSN}_3$ , and 2-aminoethanol in the absence of ethyl 4-bromobenzoate (**1**)

Ethynylbenzene (**4**) (102 mg, 1.00 mmol), copper powder (127 mg, 2.00 mmol), 2-aminoethanol (151  $\mu\text{L}$ , 2.50 mmol), and  $\text{TMSN}_3$  (266  $\mu\text{L}$ , 2.00 mmol) in DMA (2 mL) was mixed and stirred at rt, and the IR absorbance of the mixture was measured.

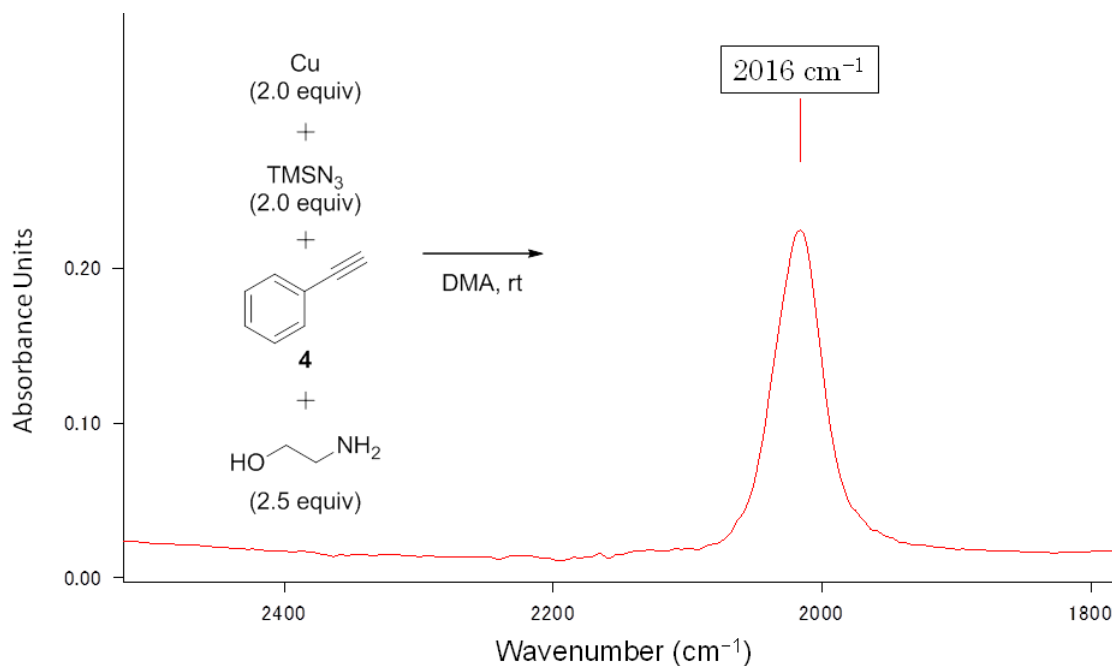

A slight change was observed in the IR spectrum by the addition of ethynylbenzene (**4**) in the mixture of copper, and  $\text{TMSN}_3$  in DMA, since the IR absorbance was detected at 2012–2013  $\text{cm}^{-1}$  regardless of the existence of ethyl 4-bromobenzoate (**1**) in the absence of **4** (Figures 1–3).
